# Supplementary material for: The added value of trabecular bone score over bone mineral density for identification of the bone architecture in patients with Inflammatory Bowel Disease
Source: Research Square preprint supplement (doi:10.21203/rs.3.rs-385221/v1), 2021-04-08
Supplement: Supplementary file 1 [file a331900ae20edf1a979ed314.doc]

Table 2. Basic characteristics of the studied patients with Inflammatory Bowel Disease (IBD)

|  | |
| --- | --- |
| 40.68 (12.22) | Age, mean (SD*); years |
| 30 (44.1)  38 (55.9) | Gender, N (%)  Male  Female |
| 26.45 (4.51) | BMI†, mean (SD), kg/m2 |
| 89.97 (10.56) | Waist circumference, mean (SD), cm |
| 28 (41.4)  40 (58.8) | Waist circumference, cm, N (%)  Normal  ≥90 in males, ≥80 in females |
| 99.06 (10.78) | Abdominal circumference, mean (SD), cm |
| 6.81 (7.20) | Disease duration, mean (SD), years |
| 56 (82.4)  10 (14.7)  2 (2.9) | Final diagnosis, N (%)  Ulcerative Colitis  Crohn’s Disease  Undifferentiated |
| (51.5) 35  (20.6) 14  (27.9) 19 | Disease duration, years, N (%)  <5  5-10  ≥ 10 |
| 28 (41)  34 (50)  6 (9) | BMD, N (%)  Normal (> -1)  Low Bone Mass (-2.5 to -1)  Osteoporosis (< -2.5) |
| 47 (69)  14 (21)  7 (10) | TBS¶, N (%)  NL (>1.350)  PDM (1.250-1.350)  FDM (< 1.250) |
| 4.06 (3.14) | FRAX#-Adjusted-MOF**; mean (SD) |

*SD: Standard Deviation

†BMI: Body Mass Index

§BMD: Bone Mineral Densitometry

¶TBS (T-score): Trabecular Bone Score

# FRAX:  Fracture Risk Assessment Tool

**MOF: Major Osteoporotic Fracture
