# Supplementary material for: The added value of trabecular bone score over bone mineral density for identification of the bone architecture in patients with Inflammatory Bowel Disease
Source: Research Square preprint supplement (doi:10.21203/rs.3.rs-385221/v1), 2021-04-08
Supplement: Supplementary file 2 [file d294605b35ed9fd8bb339c53.doc]

Table 1: Classification of the TBS* value

| Classification | TBS Value |
| --- | --- |
| High risk of fracture (fully degraded microarchitecture) | T score ≤1.200 |
| Intermediate risk (partially degraded microarchitecture) | 1.200< T score <1.350 |
| Normal | T score≥ 1.350 |

*TBS: Trabecular Bone Score
