# Supplementary material for: The added value of trabecular bone score over bone mineral density for identification of the bone architecture in patients with Inflammatory Bowel Disease
Source: Research Square preprint supplement (doi:10.21203/rs.3.rs-385221/v1), 2021-04-08
Supplement: Supplementary file 3 [file febc6fa645fdd824fc05ebe9.doc]

Table 3. Comparing the results of lumbar Bone Mineral Density and Trabecular Bone Score in patients with Inflammatory Bowel Disease (IBD)

| P | TBS† | | | N |  | |
| --- | --- | --- | --- | --- | --- | --- |
| FDM§  (T-score < 1.250) | PDM‡  (1.250< T-score <1.350) | Normal  (T-score>1.350) |
| 0.007 | 0 | 3 (21) | 25 (53) | 28 (41) | Normal  (> -1) | BMD* |
| 5 (71) | 9 (64) | 20 (42) | 34 (50) | Low density  (-2.5 to -1) |
| 2 (28) | 2 (14) | 2 (4) | 6 (8) | Osteoporosis  (< -2.5) |
|  | 7 (100) | 14 (100) | 47 (100) | 68 (10) | Total | |

*BMD: Bone Mineral Densitometry

†TBS: Trabecular Bone Score

‡PDM: Partially Degraded Microarchitecture

§FDM: Fully Degraded Microarchitecture
